# Supplementary material for: Impact of the Genotype and Phenotype of CYP3A and P-gp on the Apixaban and Rivaroxaban Exposure in a Real-World Setting
Source: MDPI journal article supplement (doi:10.3390/jpm12040526), 2022-03-24
Supplement: s1 [file s1]

## Supplementary Materials

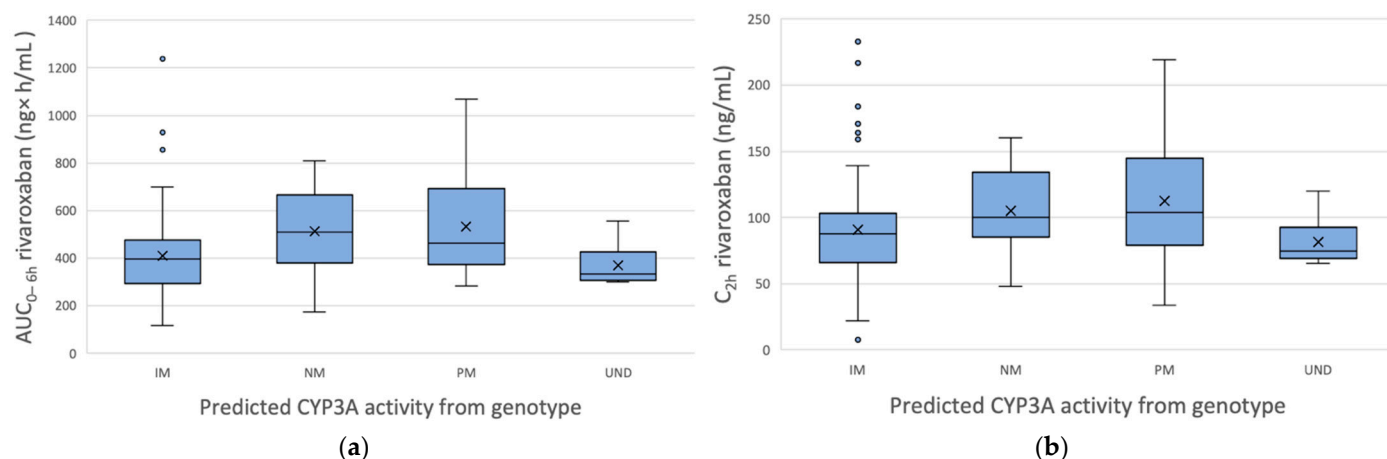

**Figure S1.** (a) AUC<sub>0-6h</sub> and (b) C<sub>2h</sub> of rivaroxaban according to the CYP3A predicted activity from genotype.

**Table S1.** SNPs of CYP3A4 and CYP3A5 studied.

| Gene   | rs Number  | Common Allele Name              |
|--------|------------|---------------------------------|
| CYP3A4 | rs12721629 | CYP3A4*12,c.1117 C>T,g.21896C>T |
|        | rs4987161  | CYP3A4*17,c.566 T>C,g.15615T>C  |
|        | rs2740574  | CYP3A4*1B, g.-392A>G            |
|        | rs55785340 | CYP3A4*2,c.664T>C,g.15713T>C    |
|        | rs35599367 | CYP3A4*22, g.15389C>T           |
|        | rs4986910  | CYP3A4*3,c.1334T>C              |
| CYP3A5 | rs28365083 | CYP3A5*2,g.27289C>A             |
|        | rs776746   | CYP3A5*3/*10,g.6986A>G          |
|        | rs28383468 | CYP3A5*3B,g.3705C>T             |
|        | rs10264272 | CYP3A5*6,g.14690G>A             |
|        | rs41303343 | CYP3A5*7,g.27131_27132insT      |
|        | rs55817950 | CYP3A5*8,g.3699C>T              |
|        | rs28383479 | CYP3A5*9,g.19386G>A             |

**Table S2.** Frequencies of the different genotypes found in our cohort as compared to frequencies found in reference population (Caucasian).

| rs ID      | Homozygous for Major Allele (Cohort) | Homozygous for Major Allele (Reference) | Heterozygous (Cohort) | Heterozygous (Reference) | Homozygous for Minor Allele (cohort) | Homozygous for Minor Allele (Reference) |
|------------|--------------------------------------|-----------------------------------------|-----------------------|--------------------------|--------------------------------------|-----------------------------------------|
| rs10264272 | 0.993                                | 0.994                                   | 0.007                 | 0.006                    | 0.000                                | 0.000                                   |
| rs12721629 | 1.000                                | 1.000                                   | 0.000                 | 0.000                    | 0.000                                | 0.000                                   |
| rs2740574  | 0.936                                | 0.946                                   | 0.064                 | 0.052                    | 0.000                                | 0.002                                   |
| rs28365083 | 0.993                                | 0.992                                   | 0.007                 | 0.008                    | 0.000                                | 0.000                                   |
| rs28383468 | 0.969                                | 0.978                                   | 0.031                 | 0.020                    | 0.000                                | 0.002                                   |
| rs28383479 | 1.000                                | 1.000                                   | 0.000                 | 0.000                    | 0.000                                | 0.000                                   |
| rs35599367 | 0.892                                | 0.903                                   | 0.105                 | 0.095                    | 0.003                                | 0.002                                   |
| rs41303343 | 1.000                                | 1.000                                   | 0.000                 | 0.000                    | 0.000                                | 0.000                                   |
| rs4986910  | 0.980                                | 0.986                                   | 0.017                 | 0.014                    | 0.003                                | 0.000                                   |
| rs4987161  | 1.000                                | 1.000                                   | 0.000                 | 0.000                    | 0.000                                | 0.000                                   |
| rs55785340 | 0.997                                | 0.996                                   | 0.000                 | 0.0004                   | 0.003                                | 0.000                                   |
| rs55817950 | 1.000                                | 1.000                                   | 0.000                 | 0.000                    | 0.000                                | 0.000                                   |
| rs776746   | 0.881                                | 0.891                                   | 0.112                 | 0.105                    | 0.007                                | 0.004                                   |
| rs1045642  | 0.264                                | 0.266                                   | 0.458                 | 0.503                    | 0.278                                | 0.231                                   |
| rs2032582  | 0.311                                | 0.316                                   | 0.451                 | 0.489                    | 0.239                                | 0.159                                   |
| rs1128503  | 0.315                                | 0.334                                   | 0.468                 | 0.501                    | 0.217                                | 0.165                                   |

**Table S3.** Multivariable linear regression models to assess if the phenotypic activity of CYP3A and P-gp are associated with the C<sub>2h</sub> of apixaban and rivaroxaban. Each independent variable is reported with its beta coefficient ( $\beta$ ) and its 95% confidence interval (CI95%).

|                                                     | C <sub>2h</sub> of Apixaban                    |  | C <sub>2h</sub> of Rivaroxaban                |  |
|-----------------------------------------------------|------------------------------------------------|--|-----------------------------------------------|--|
|                                                     | R <sup>2</sup>                                 |  |                                               |  |
|                                                     | 46%                                            |  | 22%                                           |  |
| Intercept                                           | −0.46 (−51.98 to 51.05);<br><i>p</i> = 0.9859  |  | −77.74 (−161.1 to 5.63);<br><i>p</i> = 0.0673 |  |
| Variables                                           |                                                |  |                                               |  |
| MR <sub>midazolam</sub> , per log <sub>10</sub>     | 6.07 (−8.08 to 20.22);<br><i>p</i> = 0.3979    |  | −8.35 (−30.17 to 13.47);<br><i>p</i> = 0.4503 |  |
| AUC <sub>texofenadine</sub> , per log <sub>10</sub> | 31.52 (14.92 to 48.13);<br><i>p</i> = 0.0003   |  | 47.19 (19.46 to 74.93);<br><i>p</i> = 0.001   |  |
| Weight, per kg                                      | −0.02 (−0.37 to 0.33);<br><i>p</i> = 0.9097    |  | 0.23 (−0.18 to 0.63);<br><i>p</i> = 0.2713    |  |
| CrCl, per unit                                      | −0.40 (−0.67 to −0.13);<br><i>p</i> = 0.0042   |  | −0.017 (−0.49 to 0.34);<br><i>p</i> = 0.7212  |  |
| ALAT, per unit                                      | 0.06 (−0.13 to 0.25);<br><i>p</i> = 0.5397     |  | 0.05 (−0.14 to 0.23);<br><i>p</i> = 0.6233    |  |
| Gender                                              |                                                |  |                                               |  |
| Male                                                | Reference category                             |  | Reference category                            |  |
| Female                                              | 4.07 (−5.94 to 14.08);<br><i>p</i> = 0.4233    |  | 1.91 (−13.03 to 16.84);<br><i>p</i> = 0.8009  |  |
| Dose                                                |                                                |  |                                               |  |
| 2.5 mg bid                                          | Reference category;<br><i>p</i> < 0.0001*      |  | NA                                            |  |
| 5 mg bid                                            | 51.97 (41.16 to 62.78);<br><i>p</i> < 0.0001   |  | NA                                            |  |
| 10 mg bid                                           | 116.28 (80.44 to 152.12);<br><i>p</i> < 0.0001 |  | NA                                            |  |
| 10 mg od                                            | NA                                             |  | Reference category;<br><i>p</i> = 0.0140*     |  |
| 15 mg od                                            | NA                                             |  | 18.95 (−21.77 to 59.66);<br><i>p</i> = 0.3587 |  |
| 20 mg od                                            | NA                                             |  | 39.98 (−4.47 to 84.44);<br><i>p</i> = 0.0775  |  |
| 15 mg bid                                           | NA                                             |  | 41.5 (0.24 to 82.75);<br><i>p</i> = 0.0487    |  |
| Age                                                 |                                                |  |                                               |  |
| <65 years                                           | Reference category;<br><i>p</i> = 0.4188*      |  | Reference category;<br><i>p</i> = 0.2714*     |  |
| 65–74 years                                         | 8.61 (−10.00 to 27.23);<br><i>p</i> = 0.3619   |  | 15.15 (−0.06 to 30.37);<br><i>p</i> = 0.051   |  |
| 75–84 years                                         | 13.69 (−5.59 to 32.97);<br><i>p</i> = 0.1627   |  | 10.55 (−12.65 to 33.75);<br><i>p</i> = 0.3696 |  |
| >85 years                                           | 17.73 (−3.37 to 38.82);<br><i>p</i> = 0.0990   |  | 7.97 (−15.72 to 31.67);<br><i>p</i> = 0.5066  |  |

\**p*-value for the overall association between C<sub>2h</sub> and the variable. Abbreviations: CrCl, creatinine clearance; ALAT, alanine transaminase; MR, metabolic ratio; AUC, area under the curve; C<sub>2h</sub>, concentration 2 h after drug administration; bid, twice daily; od, once daily; NA, not applicable.

**Table S4.** Multivariable linear regression models to assess if the genotype of CYP3A and P-gp are associated with the C<sub>2h</sub> of apixaban and rivaroxaban. Each independent variable is reported with its beta coefficient ( $\beta$ ) and its 95% confidence interval (CI95%).

| C <sub>2h</sub> of Apixaban             |                                                     | C <sub>2h</sub> of Rivaroxaban                   |
|-----------------------------------------|-----------------------------------------------------|--------------------------------------------------|
|                                         | R <sup>2</sup>                                      |                                                  |
| Intercept                               | 39%                                                 | 15%                                              |
|                                         | 80.68 (42.43 to 118.93);<br><i>p</i> = 0.0001       | −10.99 (−88.50 to 66.51);<br><i>p</i> = 0.7792   |
| Variables                               |                                                     |                                                  |
| Weight, per kg                          | 0.01 (−0.38 to 0.36);<br><i>p</i> = 0.9693          | 0.46 (0.04 to 0.88);<br><i>p</i> = <b>0.0328</b> |
| CrCl, per unit                          | −0.48 (−0.75 to −0.21);<br><i>p</i> = <b>0.0006</b> | −0.14 (−0.61 to 0.32);<br><i>p</i> = 0.5481      |
| ALAT, per unit                          | 0.07 (−0.17 to 0.32);<br><i>p</i> = 0.5684          | 0.08 (−0.06 to 0.22);<br><i>p</i> = 0.2719       |
| Predicted phenotype from genotype CYP3A |                                                     |                                                  |
| IM                                      | Reference category;<br><i>p</i> = 0.1103*           | Reference category;<br><i>p</i> = <b>0.0482*</b> |
| NM                                      | −2.16 (−23.45 to 19.13);<br><i>p</i> = 0.8413       | 20.74 (1.20 to 40.28);<br><i>p</i> = 0.0378      |
| PM                                      | −18.61 (−36.00 to −1.21);<br><i>p</i> = 0.0362      | 24.72 (−8.3 to 57.73);<br><i>p</i> = 0.1407      |
| Genotype <i>ABCB1</i> 1236C>T           |                                                     |                                                  |
| No mutation                             | Reference category;<br><i>p</i> = 0.7096*           | Reference category;<br><i>p</i> = 0.4203*        |
| Heterozygous for mutation               | −1.26 (−23.09 to 20.57);<br><i>p</i> = 0.9093       | −16.43 (−46.63 to 13.77);<br><i>p</i> = 0.2834   |
| Homozygous for mutation                 | −9.35 (−36.76 to 18.06);<br><i>p</i> = 0.5013       | −1.63 (−39.30 to 36.03);<br><i>p</i> = 0.9316    |
| Genotype <i>ABCB1</i> 3435C>T           |                                                     |                                                  |
| No mutation                             | Reference category;<br><i>p</i> = 0.6778*           | Reference category;<br><i>p</i> = 0.4836*        |
| Heterozygous for mutation               | −7.52 (−24.64 to 9.60);<br><i>p</i> = 0.3866        | −8.53 (−32.11 to 15.04);<br><i>p</i> = 0.4747    |
| Homozygous for mutation                 | −2.70 (−18.04 to 12.65);<br><i>p</i> = 0.7288       | −12.17 (−32.48 to 8.14);<br><i>p</i> = 0.2375    |
| Genotype <i>ABCB1</i> 2677G>T           |                                                     |                                                  |
| No mutation                             | Reference category;<br><i>p</i> = 0.7470*           | Reference category;<br><i>p</i> = 0.3409*        |
| Heterozygous for mutation               | 8.08 (−14.86 to 31.01);<br><i>p</i> = 0.4874        | 23.36 (−8.85 to 55.56);<br><i>p</i> = 0.1535     |
| Homozygous for mutation                 | 9.94 (−17.81 to 37.69);<br><i>p</i> = 0.4800        | 16.54 (−19.70 to 52.77);<br><i>p</i> = 0.3677    |
| Gender                                  |                                                     |                                                  |
| Male                                    | Reference category                                  | Reference category                               |
| Female                                  | 5.44 (−5.98 to 16.87);<br><i>p</i> = 0.3206         | 2.56 (−12.47 to 17.59);<br><i>p</i> = 0.7361     |
| Dose                                    |                                                     |                                                  |
| 2.5 mg bid                              | Reference category;<br><i>p</i> < <b>0.0001*</b>    | NA                                               |
| 5 mg bid                                | 51.17 (37.82 to 64.51);<br><i>p</i> < 0.0001        | NA                                               |

|             |                                           |                                                |
|-------------|-------------------------------------------|------------------------------------------------|
| 10 mg bid   | 113.17 (81.73 to 145.52);<br>$p < 0.0001$ | NA                                             |
| 10 mg od    | NA                                        | Reference category;<br>$p = \mathbf{0.0002}^*$ |
| 15 mg od    | NA                                        | 29.53 (−2.56 to 61.63);<br>$p = 0.0709$        |
| 20 mg od    | NA                                        | 57.40 (22.52 to 92.28);<br>$p = 0.0015$        |
| 15 mg bid   | NA                                        | 60.99 (29.95 to 92.04);<br>$p = 0.0002$        |
| Age         |                                           |                                                |
| <65 years   | Reference category;<br>$p = 0.7224^*$     | Reference category;<br>$p = \mathbf{0.0284}^*$ |
| 65–74 years | 5.10 (−15.52 to 25.71);<br>$p = 0.6257$   | 24.56 (8.41 to 40.71);<br>$p = 0.0032$         |
| 75–84 years | 9.29 (−10.54 to 29.12);<br>$p = 0.3560$   | 25.66 (−1.56 to 52.88);<br>$p = 0.0644$        |
| >85 years   | 14.31 (−10.69 to 39.31);<br>$p = 0.2597$  | 19.86 (−9.35 to 49.08);<br>$p = 0.1806$        |

\* $p$ -value for the overall association between  $C_{2h}$  and the variable. Abbreviations: CrCl, creatinine clearance; ALAT, alanine transaminase; IM, intermediate metabolizer; NM, normal metabolizer, PM, poor metabolizer; bid, twice daily; od, once daily; NA, not applicable. Statistically significant values are marked with bold.

**Table S5.** Spearman's correlation between phenotype activity of CYP3A activity predicted by genotype and  $MR_{\text{midazolam}}$  and between genotypes of P-gp and  $AUC_{\text{fexofenadine}}$  for apixaban and rivaroxaban cohorts.

|                                                                  | Apixaban                          | Rivaroxaban                       |
|------------------------------------------------------------------|-----------------------------------|-----------------------------------|
| CYP3A activity predicted by genotype and $MR_{\text{midazolam}}$ | $\rho = 0.123$ ; ( $p = 0.121$ )  | $\rho = 0.163$ ; ( $p = 0.065$ )  |
| Genotype of <i>ABCB1</i> 1236C>T and $AUC_{\text{fexofenadine}}$ | $\rho = -0.050$ ; ( $p = 0.530$ ) | $\rho = -0.060$ ; ( $p = 0.496$ ) |
| Genotype of <i>ABCB1</i> 2677G>T and $AUC_{\text{fexofenadine}}$ | $\rho = -0.011$ ; ( $p = 0.887$ ) | $\rho = 0.026$ ; ( $p = 0.772$ )  |
| Genotype of <i>ABCB1</i> 3435C>T and $AUC_{\text{fexofenadine}}$ | $\rho = 0.013$ ; ( $p = 0.870$ )  | $\rho = -0.056$ ; ( $p = 0.528$ ) |
